# Supplementary material
Source: PubMed Central journal article supplement (PMC4972157)

Supplementary material

## Pharmacokinetic/pharmacodynamic modelling of the antimalarial effect of Actelion-451840 in an induced blood stage malaria study in healthy subjects

Andreas Krause<sup>1</sup>, Jasper Dingemans<sup>1</sup>, Alexandre Mathis<sup>1</sup>, Louise Marquart<sup>2</sup>, Jörg J. Möhrle<sup>3</sup>, James S. McCarthy<sup>2</sup>

**Figure S1.** PD regression: observed data and individual regression fits

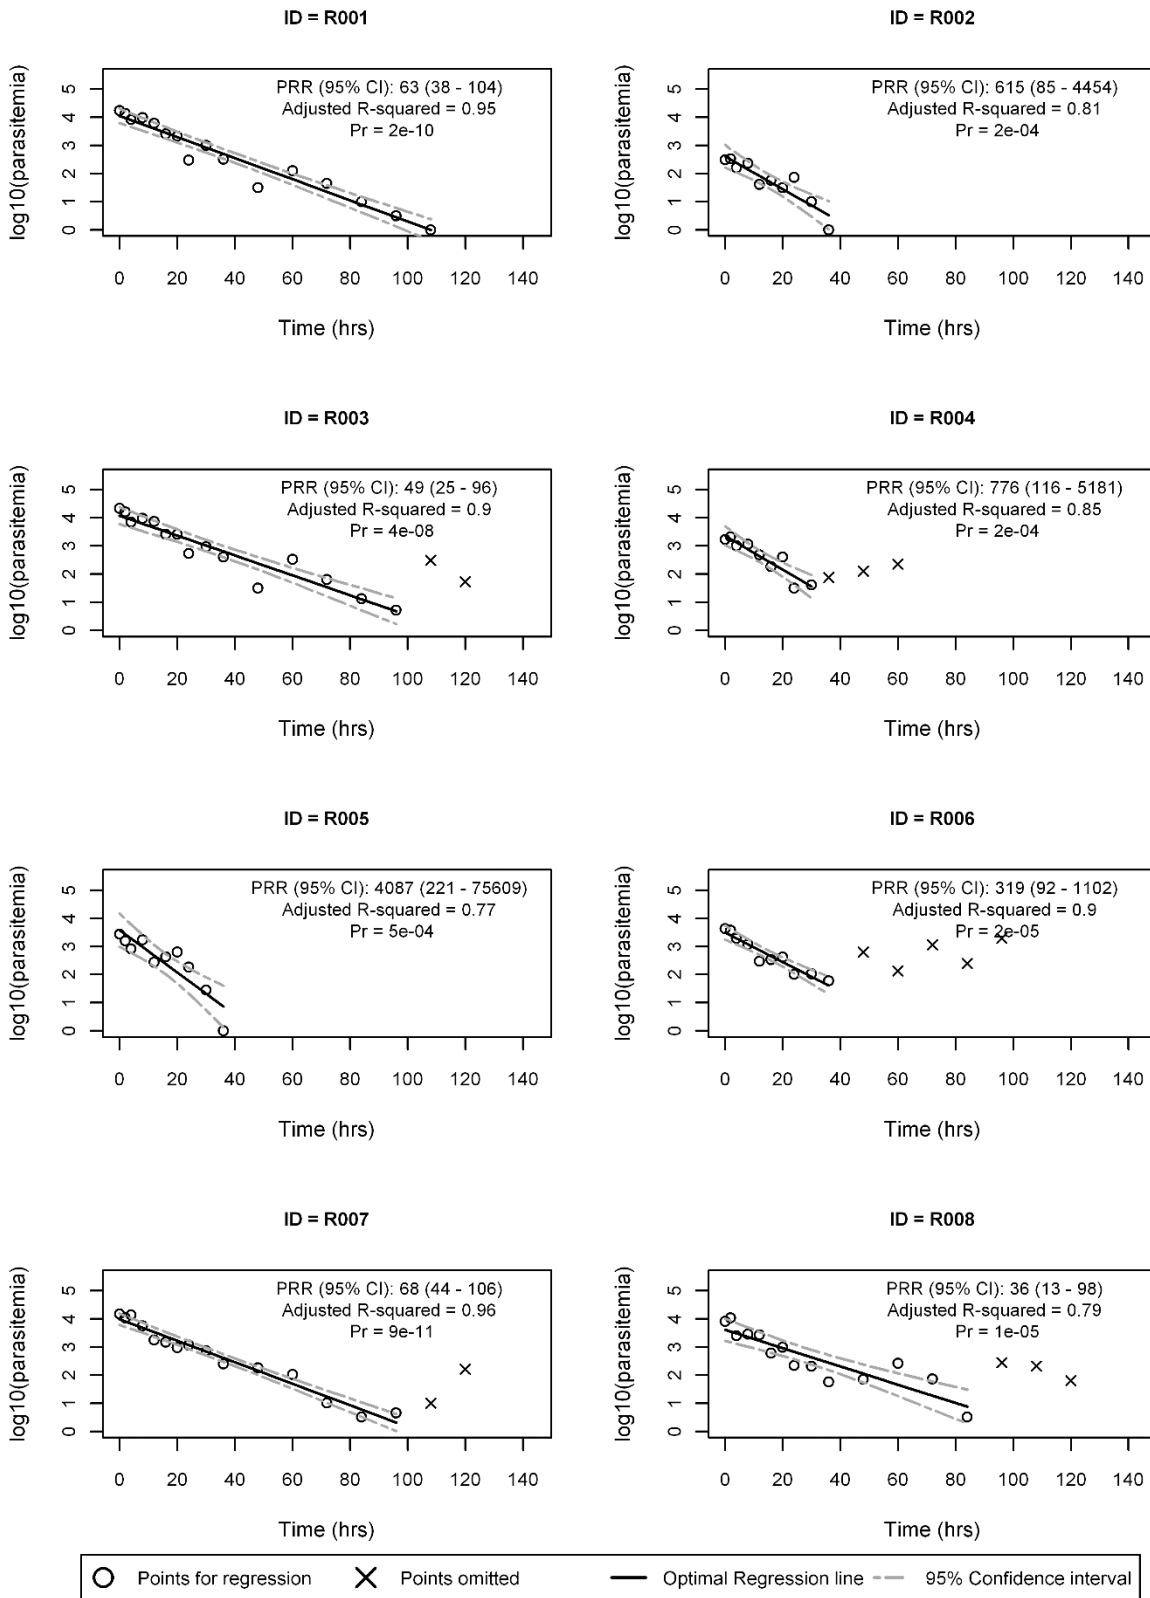

**Figure S2.** Model diagnostics PK: observed concentration and model fits by subject

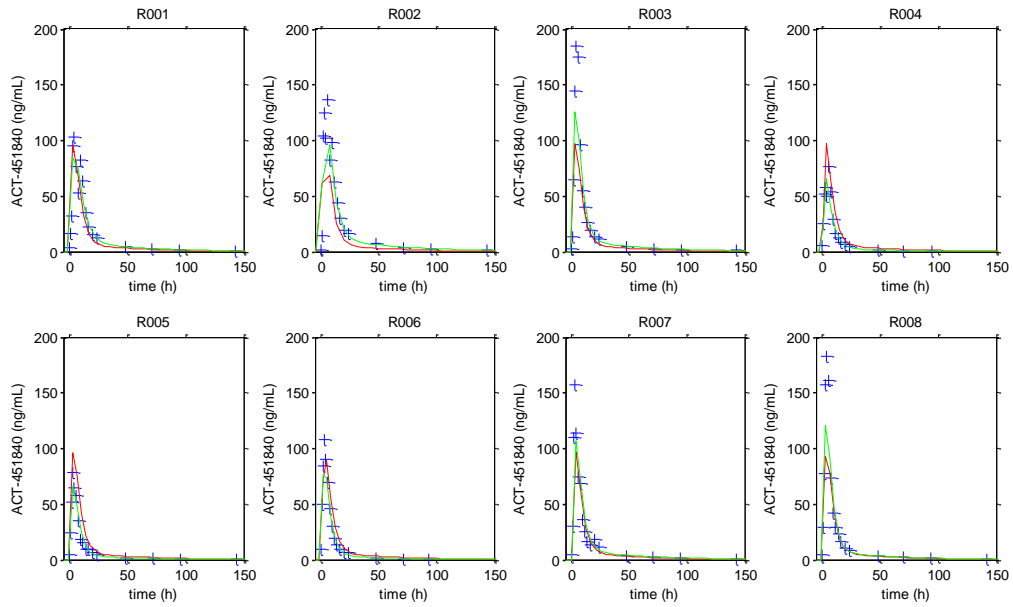

Blue symbols indicate observed data, red lines population fits, and green lines individual fits.

**Figure S3.** Model diagnostics PD: observed parasite count and model fits

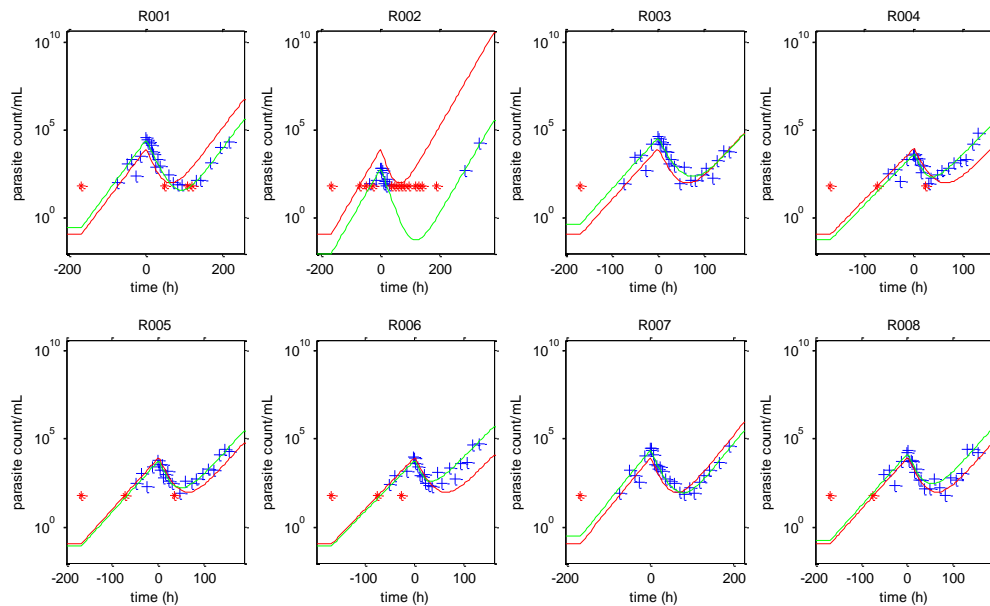

Blue symbols indicate observed data, red symbols data below the limit of quantification, red lines population fits, and green lines individual fits.

**Figure S4.** Model diagnostics PK: prediction-corrected VPC (linear and logarithmic scale)

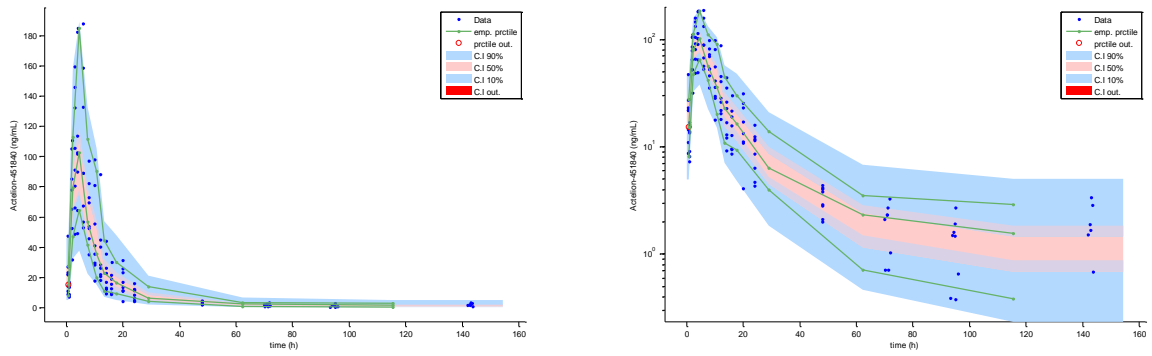

**Figure S5.** Model diagnostics PD: prediction-corrected VPC (linear and logarithmic scale)

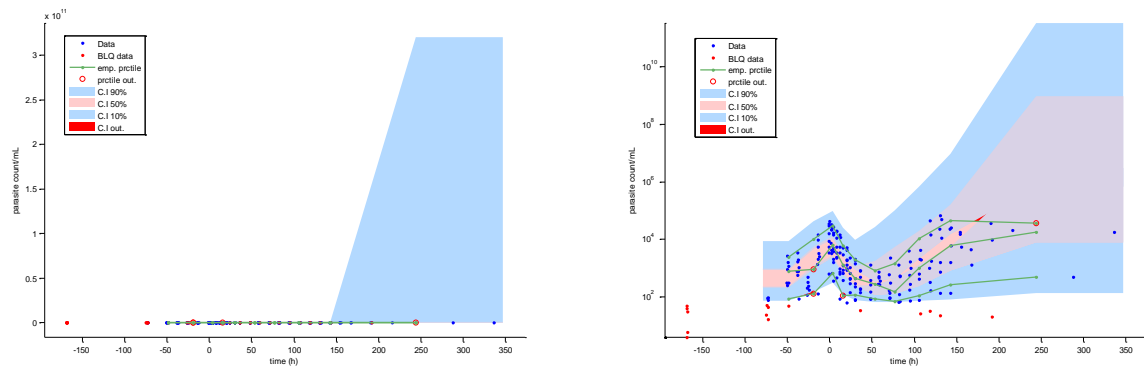

**Figure S6.** Model diagnostics PK: Observed vs. predicted drug concentration (linear and logarithmic scale)

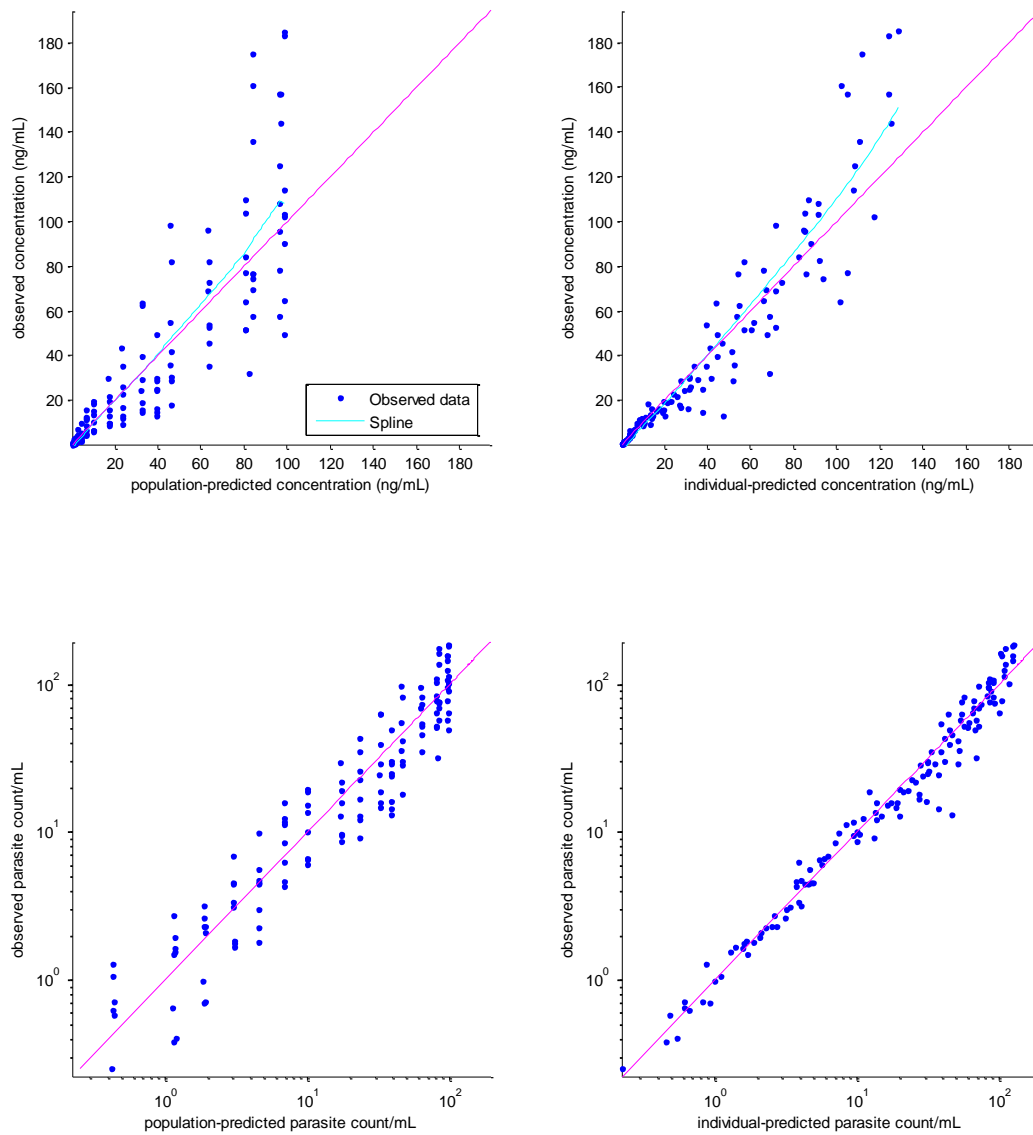

**Figure S7.** Model diagnostics PD: Observed vs. predicted parasite count (linear and logarithmic scale)

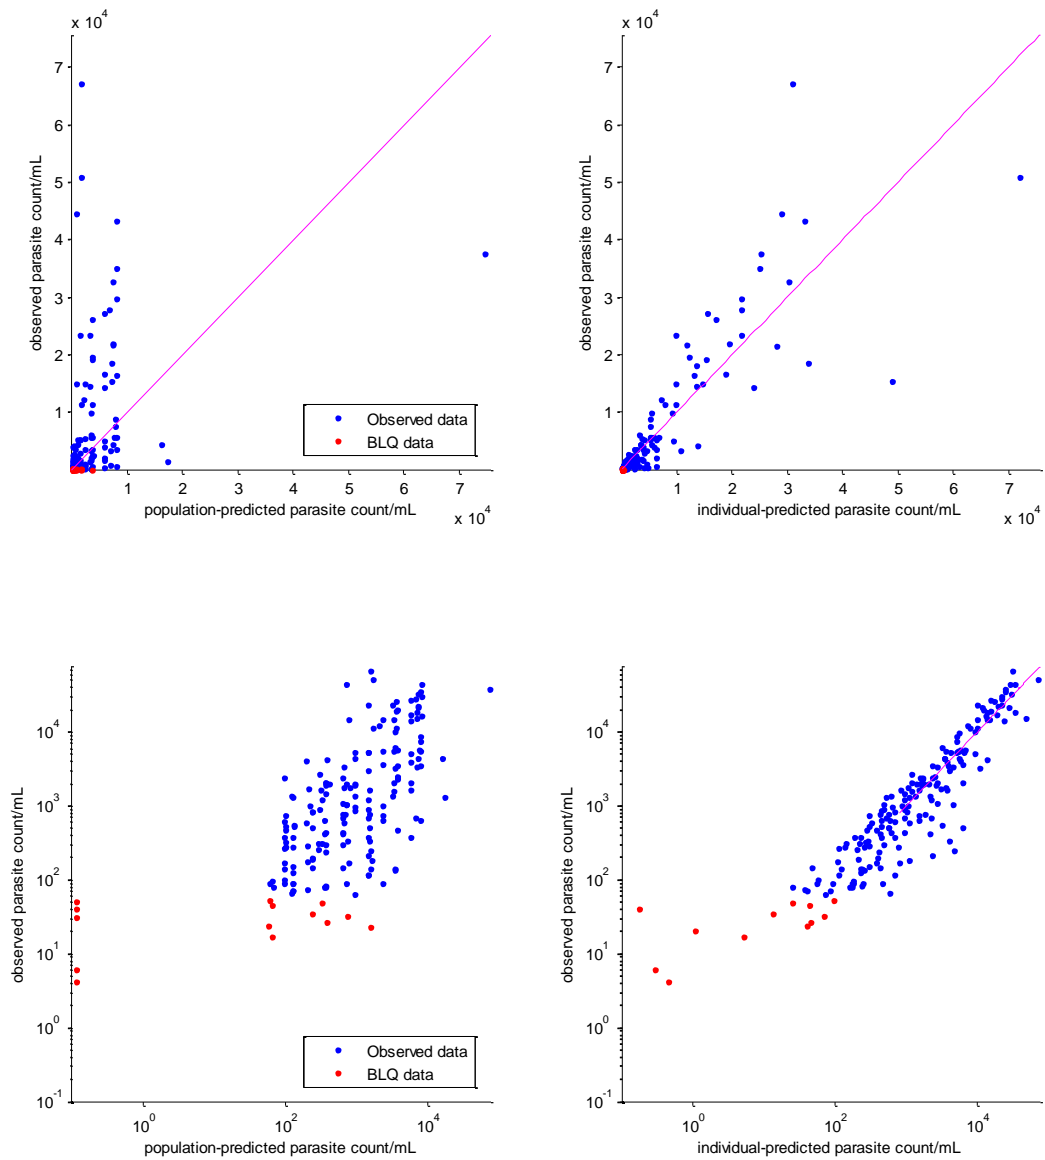

**Figure S8.** Model diagnostics PK: Residual diagnostics. Individual-weighted residuals (IWRES) and normalised prediction distribution errors (NPDE) vs. time and predicted concentration, residual distribution (theoretical distribution line and empirical histogram), quantile-quantile plot of empirical residual quantiles vs. normal distribution

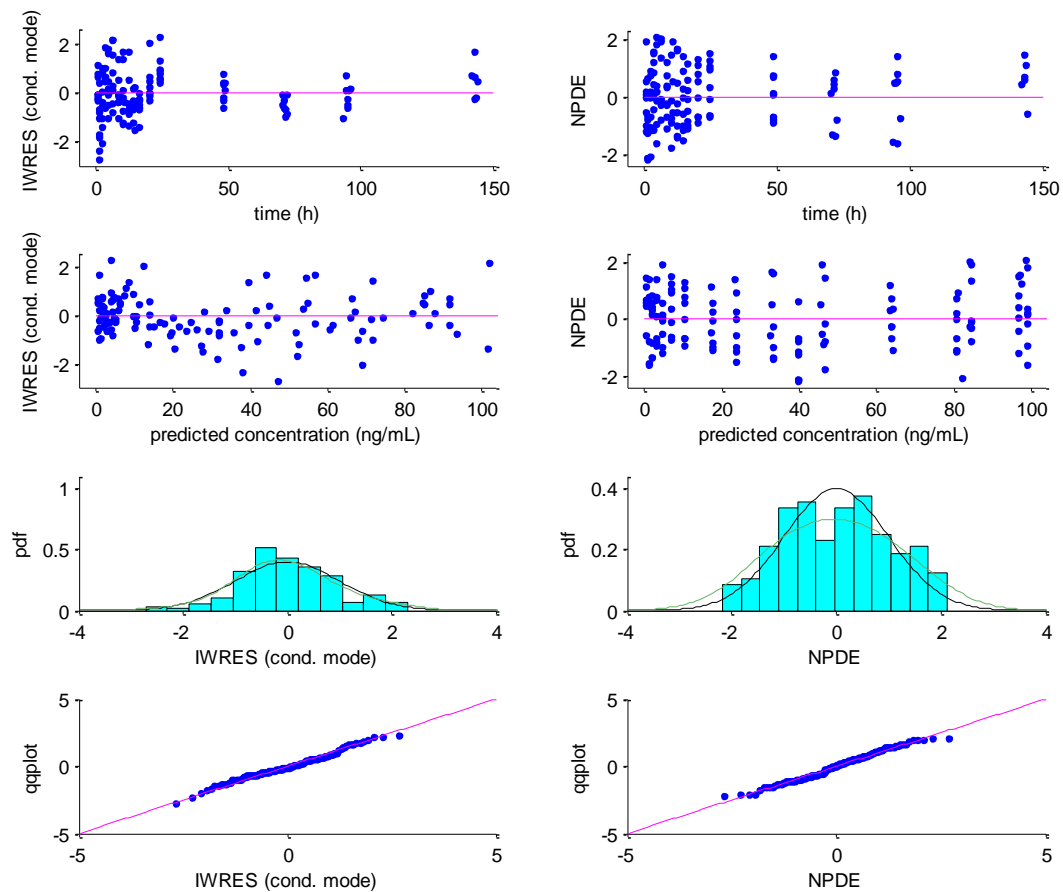

**Figure S9.** Model diagnostics PD: Residual diagnostics. Residual diagnostics. Individual-weighted residuals (IWRES) and normalised prediction distribution errors (NPDE) vs. time and predicted concentration, residual distribution (theoretical distribution line and empirical histogram), quantile-quantile plot of empirical residual quantiles vs. normal distribution

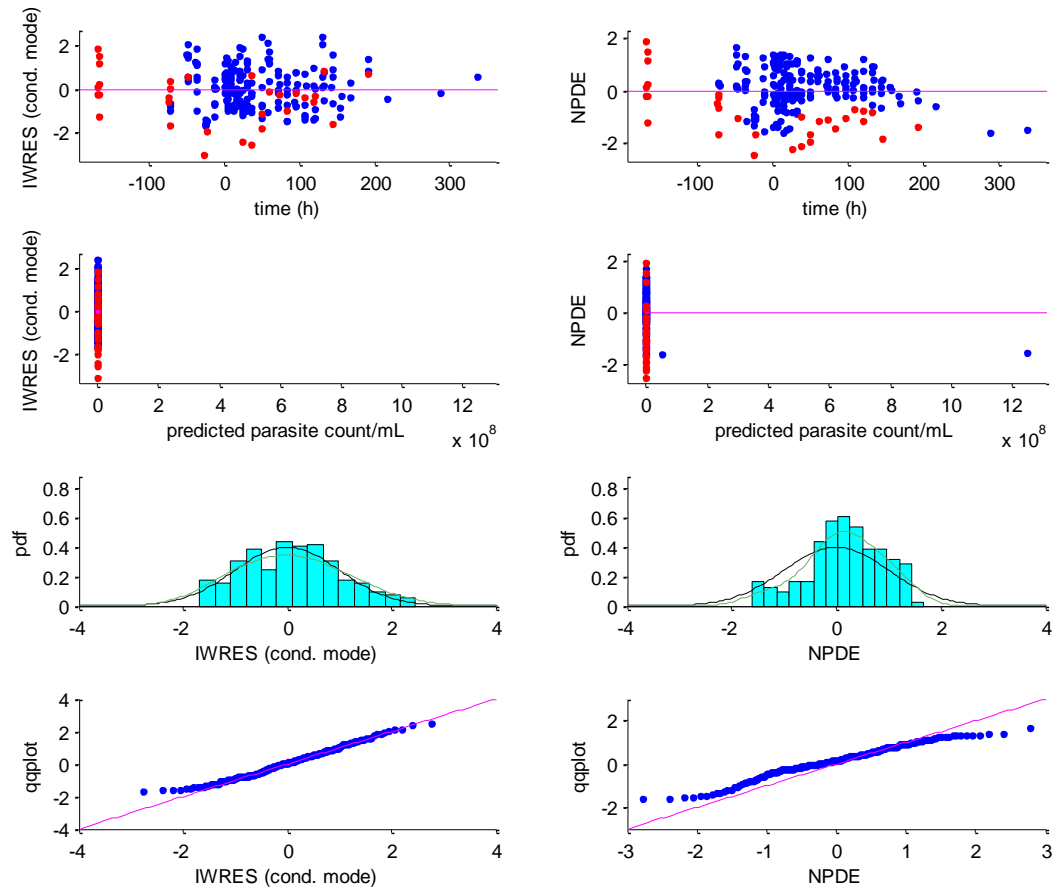

Supplement: BCP-82-412-s001.pdf [file BCP-82-412-s001.pdf]
